# Supplementary material for: CRISPR-targeted transposable element insertion for efficient plant genome engineering
Source: Research Square preprint supplement (doi:10.21203/rs.3.rs-2679086/v1), 2023-03-17
Supplement: Supplementary file 1 [file d01c47ef0a610d3795a5a468.xlsx]

## Sheet: Oligonucleotide sequences
Supplemental Table 1. Oligonucleotide sequences used in this report
Figure	Experiment	Target	Forward sequence	Reverse sequence	Notes
Supplemental Figure 1A	Amplify Pong ORF1 for In-Fusion reaction	Pong ORF1	TGAGATAAACCAATACCATGTTAGAGAGCG	GCCAGTGCCAAGCTTGCATG
Supplemental Figure 1A	Amplify Pong ORF2 for In-Fusion reaction	Pong ORF2	CATGCAAGCTTGGCACTGGC	CTATGACATGATTACGAATTCGCGATC
Supplemental Figure 1A	Amplify Cas9 and add G4S flexible linker on N terminus of Cas9	Cas9	GGCGGGGGAGGTAGCGCTCCGAAGAAGAAGAGGAAGGTTG	TCACTTCTTCTTCTTCGCCTGCC
Supplemental Figure 1A	Amplify Cas9 and add G4S flexible linker on C terminus of Cas9	Cas9	ATGGCTCCGAAGAAGAAGAGGAAG	GCTACCTCCCCCGCCCTTCTTCTTCTTCGCCTGCCC
Supplemental Figure 1A	Amplify Cas9 Nickase and add G4S flexible linker on N terminus of Cas9 Nickase	Cas9 Nickase	GGCGGGGGAGGTAGCGCTCCGAAGAAGAAGAGGAAGGTTG	TCAAACCTTCCTCTTCTTCTTAGGATCAG
Supplemental Figure 1A	Amplify Cas9 Nickase and add G4S flexible linker on N terminus of Cas9 Nickase	Cas9 Nickase	ATGGCTCCGAAGAAGAAGAGGAAG	GCTACCTCCCCCGCCAACCTTCCTCTTCTTCTTAGGATCAGC
Supplemental Figure 1A	Amplify dCas9 and add G4S flexible linker on N terminus of dCas9	dCas9	GGCGGGGGAGGTAGCGCTCCGAAGAAGAAGAGGAAGGTTG	TCAAACCTTCCTCTTCTTCTTAGGATCAG
Supplemental Figure 1A	Amplify dCas9 and add G4S flexible linker on N terminus of dCas9	dCas9	ATGGCTCCGAAGAAGAAGAGGAAG	GCTACCTCCCCCGCCAACCTTCCTCTTCTTCTTAGGATCAGC
Supplemental Figure 1A	Amplify G4S-Cas9 for In-Fusion into ORF1	G4S-Cas9	AAAGTTATTTGCTGACGGCGGGGGAGGTAGCGC	AAGAAAGCTGGGTCATCACTTCTTCTTCTTCGCCTGCCC
Supplemental Figure 1A	Amplify G4S-Cas9 for In-Fusion into ORF2	G4S-Cas9	TAGAACTGGAAATTATGGCGGGGGAGGTAGCGC	TTAGAATGTCAATTATCACTTCTTCTTCTTCGCCTGCCC
Supplemental Figure 1A	Amplify Cas9-G4S for In-Fusion into ORF1	Cas9-G4S	AAGCAGGCTTCCATGGCTCCGAAGAAGAAGAGGAAGG	GGCGACGGATCCATGCTACCTCCCCCGCCCTTC
Supplemental Figure 1A	Amplify Cas9-G4S for In-Fusion into ORF2	Cas9-G4S	CCTTCAAACGGCGCGATGGCTCCGAAGAAGAAGAGGA	ACTCTGCATGGCGCGGCTACCTCCCCCGCCCTT
Supplemental Figure 1A	Amplify G4S-Cas9 Nickase for In-Fusion into ORF1	G4S-Cas9 Nickase	AAAGTTATTTGCTGACGGCGGGGGAGGTAGCGC	AAGAAAGCTGGGTCATCAAACCTTCCTCTTCTTCTTAGG
Supplemental Figure 1A	Amplify G4S-Cas9 Nickase for In-Fusion into ORF2	G4S-Cas9 Nickase	TAGAACTGGAAATTATGGCGGGGGAGGTAGCGC	TTAGAATGTCAATTATCAAACCTTCCTCTTCTTCTTAGG
Supplemental Figure 1A	Amplify Cas9 Nickase-G4S for In-Fusion into ORF1	Cas9 Nickase-G4S	AAGCAGGCTTCCATGGCTCCGAAGAAGAAGAGGAAGG	GGCGACGGATCCATGCTACCTCCCCCGCCAACC
Supplemental Figure 1A	Amplify Cas9 Nickase-G4S for In-Fusion into ORF2	Cas9 Nickase-G4S	CCTTCAAACGGCGCGATGGCTCCGAAGAAGAAGAGG	ACTCTGCATGGCGCGGCTACCTCCCCCGCCAAC
Supplemental Figure 1A	Amplify G4S-dCas9 for In-Fusion into ORF1	G4S-dCas9	AAAGTTATTTGCTGACGGCGGGGGAGGTAGCGC	AAGAAAGCTGGGTCATCAAACCTTCCTCTTCTTCTTAGG
Supplemental Figure 1A	Amplify G4S-dCas9 for In-Fusion into ORF2	G4S-dCas9	TAGAACTGGAAATTATGGCGGGGGAGGTAGCGC	TTAGAATGTCAATTATCAAACCTTCCTCTTCTTCTTAGG
Supplemental Figure 1A	Amplify dCas9-G4S for In-Fusion into ORF1	dCas9-G4S	AAGCAGGCTTCCATGGCTCCGAAGAAGAAGAGGAAGG	GGCGACGGATCCATGCTACCTCCCCCGCCAACC
Supplemental Figure 1A	Amplify dCas9-G4S for In-Fusion into ORF2	dCas9-G4S	CCTTCAAACGGCGCGATGGCTCCGAAGAAGAAGAGG	ACTCTGCATGGCGCGGCTACCTCCCCCGCCAAC
Supplemental Figure 1A	Oligos for Golden Gate reaction	gRNA to PDS3	ATTGCCAGCCATGGTCGGCGGTC	AAACGACCGCCGACCATGGCTGG	gRNA DNA sequence for PDS3: GCCAGCCATGGTCGGCGGTC
Supplemental Figure 1A	Oligos for Golden Gate reaction	gRNA to ADH1	ATTGCTTCATGGCCGAAGATACG	AAACCGTATCTTCGGCCATGAAG	gRNA DNA sequence for ADH1: GCTTCATGGCCGAAGATACG
Supplemental Figure 1A	Oligos for Golden Gate reaction	gRNA to upstream of ACT8	ATTGTTACAGGAGTAGTTCATCG	AAACCGATGAACTACTCCTGTAA	gRNA DNA sequence for the upstream of ACT8: GTTACAGGAGTAGTTCATCG
Figure 1B, Supplemental Figure 1C, and Supplemental Figure 4B	mPing excision assay for the two-component system	donor mPing	ACGTGTCTTGTAGTTCCCGTCG	CAGTCTCAGAAGACCAAAGGGC
Supplemental Figure 2A	HRM analysis	PDS3	CAATAGCCTACTTGCCTGCT	GCTGACATGGCCAGAGAAA
Supplemental Figure 2A	HRM analysis	ADH1	TGATTCCACAGGGACAAACA	CACATGATCTCCTGGCTGAA
Supplemental Figure 2A	HRM analysis	upstream of ACT8	AGCTAATAGATGGAAACTTATCG	AACAATTTGACAACAACACA
Figure 1C, Supplemental Figure 3B, and Supplemental Figure 5B	Targeted insertion assay for mPing insert into PDS3	mPing insert into PDS3	GTGCGACCTCCGCATTCTC	GAGAATGCGGAGGTCGCAC
Figure 1C, Supplemental Figure 3B, and Supplemental Figure 5B	Targeted insertion assay for mPing insert into PDS3	mPing insert into PDS3	CTCCGTTGTAGCATTAGCGCTG	GTGCGACCTCCGCATTCTC
Figure 1C, Supplemental Figure 3B, and Supplemental Figure 5B	Targeted insertion assay for mPing insert into PDS3	mPing insert into PDS3	TGCATTGCATTGACAGTTCATCAGG	GTGCGACCTCCGCATTCTC
Figure 1C, Supplemental Figure 3B, and Supplemental Figure 5B	Targeted insertion assay for mPing insert into PDS3	mPing insert into PDS3	CTCCGTTGTAGCATTAGCGCTG	GCAAGAGATCCGGTGAATGAAACG
Figure 2E and Figure 4C	Primary PCR for Insertseq	mPing	GCAAGAGATCCGGTGAATGAAACG	CAGCTATGACCATGATTACGCCAA
Figure 2E and Figure 4C	Secondary PCR for Insertseq	mPing	ACGCTGACGAGTTTCACCAG	GGCCGCGAATTCACTAGTGAT
Figure 2E and Figure 4C	Tertiary PCR for Insertseq	mPing	AATGATACGGCGACCACCGAGATCTACACNNNNNNNNTCGTCGGCAGCGTCAGATGTGTATAAGAGACAGACGCTGACGAGTTTCACCAG	CAAGCAGAAGACGGCATACGAGATNNNNNNNNGTCTCGTGGGCTCGGAGATGTGTATAAGAGACAGGGCCGCGAATTCACTAGTGAT	index: NNNNNNNN
Supplemental Figure 4E	Targeted insertion assay for mPing insert into ADH1	mPing insert into ADH1	GCAGAAACACGAAGTTCGTATCAAG	CACTCTGTTACCGAGGACTTGG
Supplemental Figure 4E	Targeted insertion assay for mPing insert into ADH1	mPing insert into ADH1	ACATGTTTGATTCCTCCGAGTGG	AGTGAAACCCCTCCACTGTG
Supplemental Figure 4E	Targeted insertion assay for mPing insert into ADH1	mPing insert into ADH1	GCAGAAACACGAAGTTCGTATCAAG	AGTGAAACCCCTCCACTGTG
Supplemental Figure 4E	Targeted insertion assay for mPing insert into ADH1	mPing insert into ADH1	ACATGTTTGATTCCTCCGAGTGG	CACTCTGTTACCGAGGACTTGG
Figure 3B and Supplemental Figure 4F	Targeted insertion assay for mPing insert into the upstream of ACT8	mPing insert into the upstream of ACT8	TGTTTCTCAAACAAGGATAATGTTGCC	GAGAATGCGGAGGTCGCAC
Figure 3B and Supplemental Figure 4F	Targeted insertion assay for mPing insert into the upstream of ACT8	mPing insert into the upstream of ACT8	GTCAGGTGAATGTAGTAGACCCATG	TGCTTTGCTTAGTCTTGGAAACG
Figure 3B and Supplemental Figure 4F	Targeted insertion assay for mPing insert into the upstream of ACT8	mPing insert into the upstream of ACT8	TGTTTCTCAAACAAGGATAATGTTGCC	GTGCGACCTCCGCATTCTC
Figure 3B and Supplemental Figure 4F	Targeted insertion assay for mPing insert into the upstream of ACT8	mPing insert into the upstream of ACT8	GTCAGGTGAATGTAGTAGACCCATG	GCAAGAGATCCGGTGAATGAAACG
Supplemental Figure 5A	Amplify mPing donor for In-Fusion	mPing donor	AAACACTGATAGTTTTTCCCGATCTAGTAACATAGATGAC	TCCCGCCTTCAGTTTCCCAGATTAGCCTTTTCAATTTCAG
Figure 3B	mPing excision assay for T1 individuals of fused vector	donor mPing	AAACACTGATAGTTTTGTTATATCTC	AAGGCAAGTCGAAGCTTGGC
Figure 3B	mPing excision assay for T1 individuals of unfused vector	donor mPing	GGAGCTGGTTAAACATTGTCTTTGAC	AAGGCAAGTCGAAGCTTGGC
Supplemental Figure 6B	mPing excision assay for mPing_HSEs	mPing_HSEs donor	CACGTGATCTCCTTGGATCCTCTAG	AAGGCAAGTCGAAGCTTGGC
Supplemental Figure 6C	Targeted insertion assay for mPing_HSEs insert into the upstream of ACT8	mPing insert into the upstream of ACT8	TGTTTCTCAAACAAGGATAATGTTGCC	AGGAACTTTCTGGAAACGACGC
Supplemental Figure 6C	Targeted insertion assay for mPing_HSEs insert into the upstream of ACT8	mPing insert into the upstream of ACT8	GTCAGGTGAATGTAGTAGACCCATG	AGGAACTTTCTGGAAACGACGC
Supplemental Figure 6E	Targeted insertion assay for mPing_HSEs insert into the upstream of ACT8	mPing insert into the upstream of ACT8	GTCAGGTGAATGTAGTAGACCCATG	ATTGCACGGCTACCCAAA
Supplemental Figure 7A	mPing excision assay for T1 individuals of unfused vector	mPing_bar and mPing_bar CDS donors	GGAGCTGGTTAAACATTGTCTTTGAC	AAGGCAAGTCGAAGCTTGGC
Supplemental Figure 7C	Targeted insertion assay for mPing insert into the upstream of ACT8	mPing insert into the upstream of ACT8	TGTTTCTCAAACAAGGATAATGTTGCC	GACCGTGCTTGTCTCGATGT
Supplemental Figure 7C	Targeted insertion assay for mPing insert into the upstream of ACT8	mPing insert into the upstream of ACT8	GTCAGGTGAATGTAGTAGACCCATG	GACCGTGCTTGTCTCGATGT
Supplemental Figure 8A	Targeted insertion assay	mPing_bar in upstream of ACT8	GTCAGGTGAATGTAGTAGACCCATG	GATACAAGTTGCTGGGATCATTTG
Supplemental Figure 9A	Targeted insertion assay	mPing_bar CSD in upstream of ACT8	GTCAGGTGAATGTAGTAGACCCATG	GATACAAGTTGCTGGGATCATTTG
Supplemental Figure 10A	Amplify mPing donor and U6 promoter for In-Fusion (for vector of +mPIng,+ORF1,+ORF2-Cas9)	mPing donor and U6 promoter	TGCCTGCAGGTCGACTCTAGCCCGATCTAGTAACATAGATGACAC		gRNA DNA sequence for DD20: GGAACTGACACACGACATGA
Supplemental Figure 10A	Amplify gRNA scaffold, U6 terminator, and ORF1/ORF2-Cas9 for In-Fusion (for vector of +mPIng,+ORF1,+ORF2-Cas9)	gRNA scaffold, U6 terminator, and ORF1/ORF2-Cas9	GGAACTGACACACGACATGAGTTTTAGAGCTAGAAATAGCAAGTT	GGTACCCGGGGATCCTCTAGCTATGACATGATTACGAATTCGCG	gRNA DNA sequence for DD20: GGAACTGACACACGACATGA
Supplemental Figure 10A	Amplify mPing donor and U6 promoter for In-Fusion (for vector of +mPIng,+Cas9 control)	mPing donor and U6 promoter	TGCCTGCAGGTCGACTCTAGTGTTATATCTCCTTGGATCCTCTAG	TCATGTCGTGTGTCAGTTCCAATCACTACTTCGACTCTAGCTG	gRNA DNA sequence for DD20: GGAACTGACACACGACATGA
Supplemental Figure 10A	Amplify gRNA scaffold, U6 terminator, and Cas9 for In-Fusion (for vector of +mPIng,+Cas9 control)	gRNA scaffold, U6 terminator, and Cas9	GGAACTGACACACGACATGAGTTTTAGAGCTAGAAATAGCAAGTT	GGTACCCGGGGATCCTCTAGCGTTGTCAATCAATTGGCAAGTC	gRNA DNA sequence for DD20: GGAACTGACACACGACATGA
Supplemental Figure 10A	Amplify ORF1/ORF2 for In-Fusion (for vector of +mPIng,+Cas9, +ORF1,+ORF2l)	ORF1/ORF2-Cas9	CCATGGTTATACTAGGAGCGCTAGTTCGTGAGTAG	TATCCTGATCACTAGCTATGACATGATTACGAATTCGCG
Figure 4A	mPing excision assay in soy for fused vector	donor mPing	ACGTGTCTTGTAGTTCCCGTCG	CAGTCTCAGAAGACCAAAGGGC
Figure 4A	mPing excision assay in soy for unfused vectors	donor mPing	CTTGTCCAGATAGCCCAGTAGC	AAGGCAAGTCGAAGCTTGGC
Figure 4A	Mutation detection	DD20 in soy	CTTTCAAAGGCTACACAAAAGC	AGTCATAACAACCCTTGTCAAC
Figure 4A and Supplemental 10C	Targeted insertion assay for mPing insert into the DD20	mPing insert in DD20	GAGATAGGGTGTATTCATGTGTAGACG	CACTCTGTTACCGAGGACTTGG
Figure 4A and Supplemental 10C	Targeted insertion assay for mPing insert into the DD20	mPing insert in DD20	TGAGACGAACACACACCTAATCATG	GTGCGACCTCCGCATTCTC
Figure 4A and Supplemental 10C	Targeted insertion assay for mPing insert into the DD20	mPing insert in DD20	GAGATAGGGTGTATTCATGTGTAGACG	TGCTTTGCTTAGTCTTGGAAACG
Figure 4A and Supplemental 10C	Targeted insertion assay for mPing insert into the DD20	mPing insert in DD20	AAGACCTCTGGTTCCATTTCACTC	CACTCTGTTACCGAGGACTTGG
Figure 4A	Targeted insertion assay for mPing_HSEs insert into the DD20	mPing_HSEs insert into the DD20	GAGATAGGGTGTATTCATGTGTAGACG	GGTGAATGTTCAAGAATCGGCCT
Figure 4A	Targeted insertion assay for mPing_HSEs insert into the DD20	mPing_HSEs insert into the DD20	AAGACCTCTGGTTCCATTTCACTC	ACCTTCCAGAACATTCTCCCG
Figure 4A	Targeted insertion assay for mPing_HSEs insert into the DD20	mPing_HSEs insert into the DD20	GAGATAGGGTGTATTCATGTGTAGACG	ACCTTCCAGAACATTCTCCCG
Figure 4A	Targeted insertion assay for mPing_HSEs insert into the DD20	mPing_HSEs insert into the DD20	AAGACCTCTGGTTCCATTTCACTC	AGGAACTTTCTGGAAACGACGC
